# Supplementary material for: The impact of crisis and COVID-19 on Syrian children growth, health awareness and nutritional practices. a cross-sectional study
Source: Springer Nature journal article supplement (doi:10.1186/s12887-023-04115-w), 2023-06-15
Supplement: MOESM1 [file 25490562]

Table S1: Parents questionnaire module

|                |               |                   |
|----------------|---------------|-------------------|
| Serial number: | School :      | Grade:            |
| Child Name:    | Child Gender: | Child Birth date: |
| Child Weight:  | Child Height: |                   |

**Please fill the following questions by parents or child direct care provider**

What is the mother's educational level?

|              |             |          |               |
|--------------|-------------|----------|---------------|
| No education | High school | bachelor | Master or PhD |
|--------------|-------------|----------|---------------|

What is the father's educational level?

|              |             |          |               |
|--------------|-------------|----------|---------------|
| No education | High school | bachelor | Master or PhD |
|--------------|-------------|----------|---------------|

How do you describe your financial situation?

|          |         |      |      |           |
|----------|---------|------|------|-----------|
| Very bad | Not bad | fair | good | Very good |
|----------|---------|------|------|-----------|

On a scale from 1 to 5, how much has your financial situation affected by Corona disease?

Never affected 1 2 3 4 5 very affected

Do you give your child any supportive vitamins? If your answer is yes, what is the reason?

|                     |                      |                                |                                    |
|---------------------|----------------------|--------------------------------|------------------------------------|
| Yes, a prescription | To increase immunity | Yes, to improve mental ability | Yes, to make up for the deficiency |
|---------------------|----------------------|--------------------------------|------------------------------------|

If you do not give your child any vitamins, why?

|         |                                     |                |                                      |
|---------|-------------------------------------|----------------|--------------------------------------|
| No need | I don't think it is good for health | Very expensive | i prefer Natural sources of vitamins |
|---------|-------------------------------------|----------------|--------------------------------------|

Do you think your child gets enough vitamins through his/her food?

|     |    |          |
|-----|----|----------|
| Yes | No | Not sure |
|-----|----|----------|

Has your family's use of vitamins increased after the spread of Corona disease in Syria?

|     |    |
|-----|----|
| Yes | No |
|-----|----|

Does your child currently suffer from one of the following diseases?

|                              |                                                       |        |                            |
|------------------------------|-------------------------------------------------------|--------|----------------------------|
| Chronic respiratory problems | Diabetes                                              | Anemia | Rickets or growth problems |
| Frequent infections          | Dental problems (delayed eruption or multiple caries) |        | Nothing from this list     |

Do you notice one of these behavioral signs on your child?

|                         |                                      |                      |                                   |
|-------------------------|--------------------------------------|----------------------|-----------------------------------|
| Lack of appetite        | Insomnia or Sleep Difficulties       | Fatigue and weakness | Tense or difficulty concentrating |
| Nervousness or violence | Difficulties in academic achievement |                      | Nothing from this list            |

Have you noticed the following symptoms on your child? Several answers can be selected

|                       |                                                                        |           |                        |
|-----------------------|------------------------------------------------------------------------|-----------|------------------------|
| Frequent constipation | Frequent bruises                                                       | Hair loss | Muscle pain            |
| Bow legs              | Cracks or inflammation at the corners of the mouth (Angular cheilitis) |           | Nothing from this list |

How long has breastfeeding been used for your baby as an infant?

|                  |                    |                    |                |
|------------------|--------------------|--------------------|----------------|
| No breastfeeding | Less than 6 months | More than 6 months | A year or more |
|------------------|--------------------|--------------------|----------------|

How many hours does your child sleep?

|                   |           |           |            |             |
|-------------------|-----------|-----------|------------|-------------|
| Less than 6 hours | 6-7 hours | 7-8 hours | 9-10 hours | 11-12 hours |
|-------------------|-----------|-----------|------------|-------------|

does one or both of the parents smoke?

|                          |                         |                         |                              |
|--------------------------|-------------------------|-------------------------|------------------------------|
| Both parents are smokers | Only father is a smoker | Only mother is a smoker | Both parents are not smokers |
|--------------------------|-------------------------|-------------------------|------------------------------|

Healthy and Dietary habits assessment:

Does your child drink milk?

|       |        |           |       |        |
|-------|--------|-----------|-------|--------|
| never | rarely | sometimes | often | always |
|-------|--------|-----------|-------|--------|

Does your child eat fish or other seafood?

|       |        |           |       |        |
|-------|--------|-----------|-------|--------|
| never | rarely | sometimes | often | always |
|-------|--------|-----------|-------|--------|

Does your child eat red meat or liver?

|       |        |           |       |        |
|-------|--------|-----------|-------|--------|
| never | rarely | sometimes | often | always |
|-------|--------|-----------|-------|--------|

Do you use iodized salt in food preparation?

|       |        |           |       |        |
|-------|--------|-----------|-------|--------|
| never | rarely | sometimes | often | always |
|-------|--------|-----------|-------|--------|

Does your child eat breakfast before school?

|       |        |           |       |        |
|-------|--------|-----------|-------|--------|
| never | rarely | sometimes | often | always |
|-------|--------|-----------|-------|--------|

How often does your child eat fruits?

|       |        |           |       |        |
|-------|--------|-----------|-------|--------|
| never | rarely | sometimes | often | always |
|-------|--------|-----------|-------|--------|

Does your child eat unhealthy foods such as Soda, Candy, and chips...?

|       |        |           |       |        |
|-------|--------|-----------|-------|--------|
| never | rarely | sometimes | often | always |
|-------|--------|-----------|-------|--------|

Answer the following statements, with true or false (Knowledge score)

|                                                                                                           |   |   |
|-----------------------------------------------------------------------------------------------------------|---|---|
| The main source of Vitamin D is seafood                                                                   | √ | × |
| Citrus fruits enhance dietary iron absorption                                                             | √ | × |
| Vitamin D deficiency can be associated with obesity                                                       | √ | × |
| Excessive drinking of milk leads to child iron deficiency anemia                                          | √ | × |
| Egg yolks are rich in iron and vitamin D.                                                                 | √ | × |
| Rickets is a disease caused by a lack of vitamin E                                                        | √ | × |
| Breast milk is completely sufficient for the baby during the first six months without any additional food | √ | × |
| Liver is an excellent source of vitamin B12                                                               | √ | × |
| The main source of vitamin A is sun exposure                                                              | √ | × |
| Vitamin K is critical for vision function                                                                 | √ | × |

correct answer was counted as 1, and Incorrect answers was counted as 0, a mark of ten was calculated

This questionnaire was prepared for the purpose of scientific research under the auspices of the Directorate of Education in Homs governorate..... We thank you for your cooperation

---

Parents questionnaire module was filled by children legal guardians in the purpose of socioeconomic assessment, children health assessment, Healthy and Dietary habits assessment.
