# Supplementary material for: The impact of crisis and COVID-19 on Syrian children growth, health awareness and nutritional practices. a cross-sectional study
Source: Springer Nature journal article supplement (doi:10.1186/s12887-023-04115-w), 2023-06-15
Supplement: MOESM2 [file 25490562]

Table S2: Child questionnaire module

Knowledge Score: correct answer was counted as 1, and Incorrect answers was counted as 0, a mark of 10 was calculated

|                                                                                            |   |   |
|--------------------------------------------------------------------------------------------|---|---|
| 1. food you eat today affects the growth of your body in the future                        | √ | × |
| 2. It is not necessary to have a breakfast before school                                   | √ | × |
| 3. vegetables and fruits are important parts of a healthy diet                             | √ | × |
| 4. Meat is a good source of protein                                                        | √ | × |
| 5. healthy food does not contain vitamins                                                  | √ | × |
| 6. One of the important ways to protect yourself against Corona disease is Social distance | √ | × |
| 7. food pyramid's largest group contains eggs and sugar                                    | √ | × |

8. Which of the following foods are harmful to dental health?

|      |     |       |       |      |
|------|-----|-------|-------|------|
| Milk | Egg | Sugar | Fruit | Fish |
|------|-----|-------|-------|------|

9. Which of these foods should be eaten in the least amount?

|              |            |             |                    |      |
|--------------|------------|-------------|--------------------|------|
| Bread & rice | Dairy food | Sugar & fat | Vegetables & Fruit | meat |
|--------------|------------|-------------|--------------------|------|

10. Which of the following foods is high in salt and is not healthy?

|       |           |       |        |                           |
|-------|-----------|-------|--------|---------------------------|
| Chips | Chocolate | Risen | Grapes | All the previous is false |
|-------|-----------|-------|--------|---------------------------|

## Attitude Score

correct answer was counted as 1, and Incorrect answers was counted as 0, a mark of 8 was calculated

1. Which of the following is a good and healthy option?

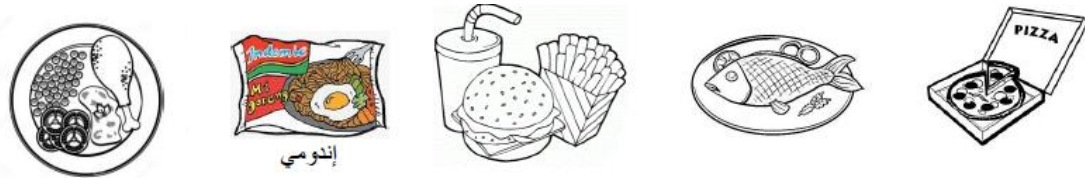

2. Which of the following activities is a good sport for your body?

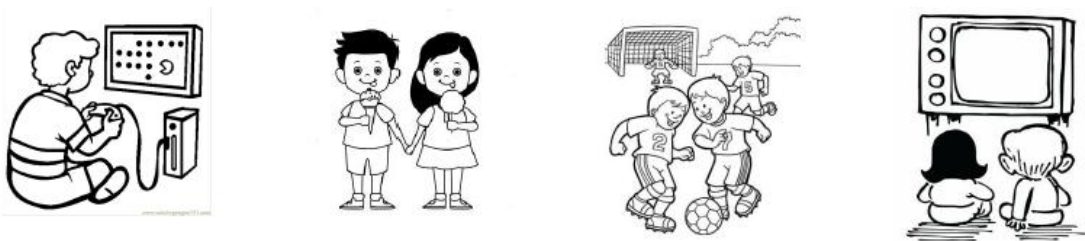

3. If I feel thirsty, which of the following drinks should I drink more?

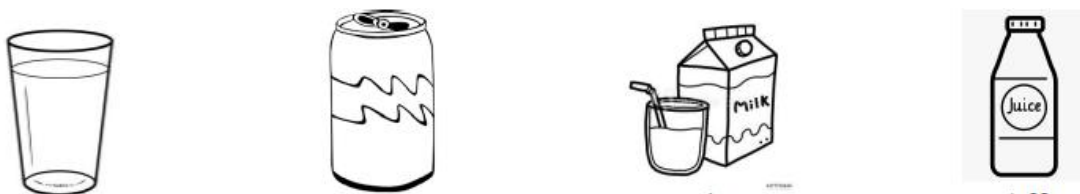

4. Which of the following is a healthy snack?

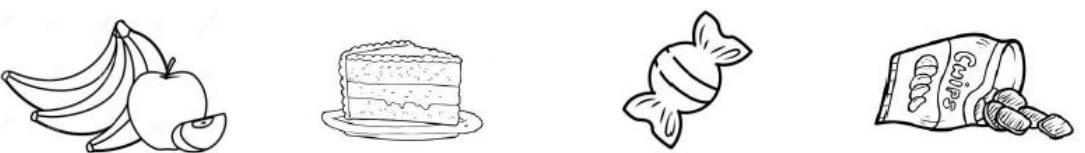

5. Which of the following is unhealthy?

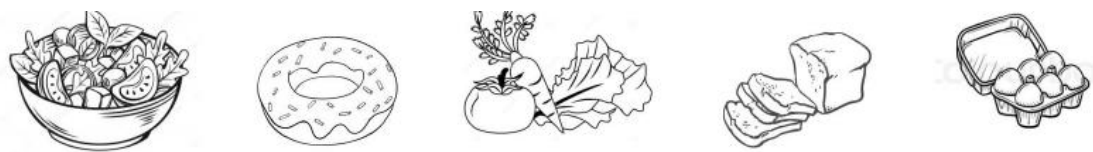

|                                                                         |          |              |
|-------------------------------------------------------------------------|----------|--------------|
| 6. Do you prefer to have a breakfast before school?                     | Yes      | No           |
| 7. Do you think healthy diet is important for your growth?              | Yes      | No           |
| 8. Do you think it is more healthy to eat Homemade or Store-bought Food | Homemade | Store-bought |

How often do you eat vegetables?

|                     |            |                           |             |           |
|---------------------|------------|---------------------------|-------------|-----------|
| several times a day | Once a day | Several times in the week | Once a week | Never eat |
|---------------------|------------|---------------------------|-------------|-----------|

How often do you eat fruit?

|                     |            |                      |             |           |
|---------------------|------------|----------------------|-------------|-----------|
| several times a day | Once a day | Several times a week | Once a week | Never eat |
|---------------------|------------|----------------------|-------------|-----------|

How often do you eat dairy foods?

|                     |            |                      |             |           |
|---------------------|------------|----------------------|-------------|-----------|
| several times a day | Once a day | Several times a week | Once a week | Never eat |
|---------------------|------------|----------------------|-------------|-----------|

How often do you watch TV?

|           |                      |                 |                |
|-----------|----------------------|-----------------|----------------|
| Every day | Several times a week | Only on holiday | Never watch TV |
|-----------|----------------------|-----------------|----------------|

How often do you do sports?

|           |                      |             |                       |       |
|-----------|----------------------|-------------|-----------------------|-------|
| Every day | Several times a week | once a week | Several times a month | Never |
|-----------|----------------------|-------------|-----------------------|-------|

---

Child questionnaire module was filled by third grade students in the purpose of health knowledge assessment, health attitude assessment, and dietary habits assessment.
